# Supplementary material
Source: PubMed Central journal article supplement (PMC6531050)

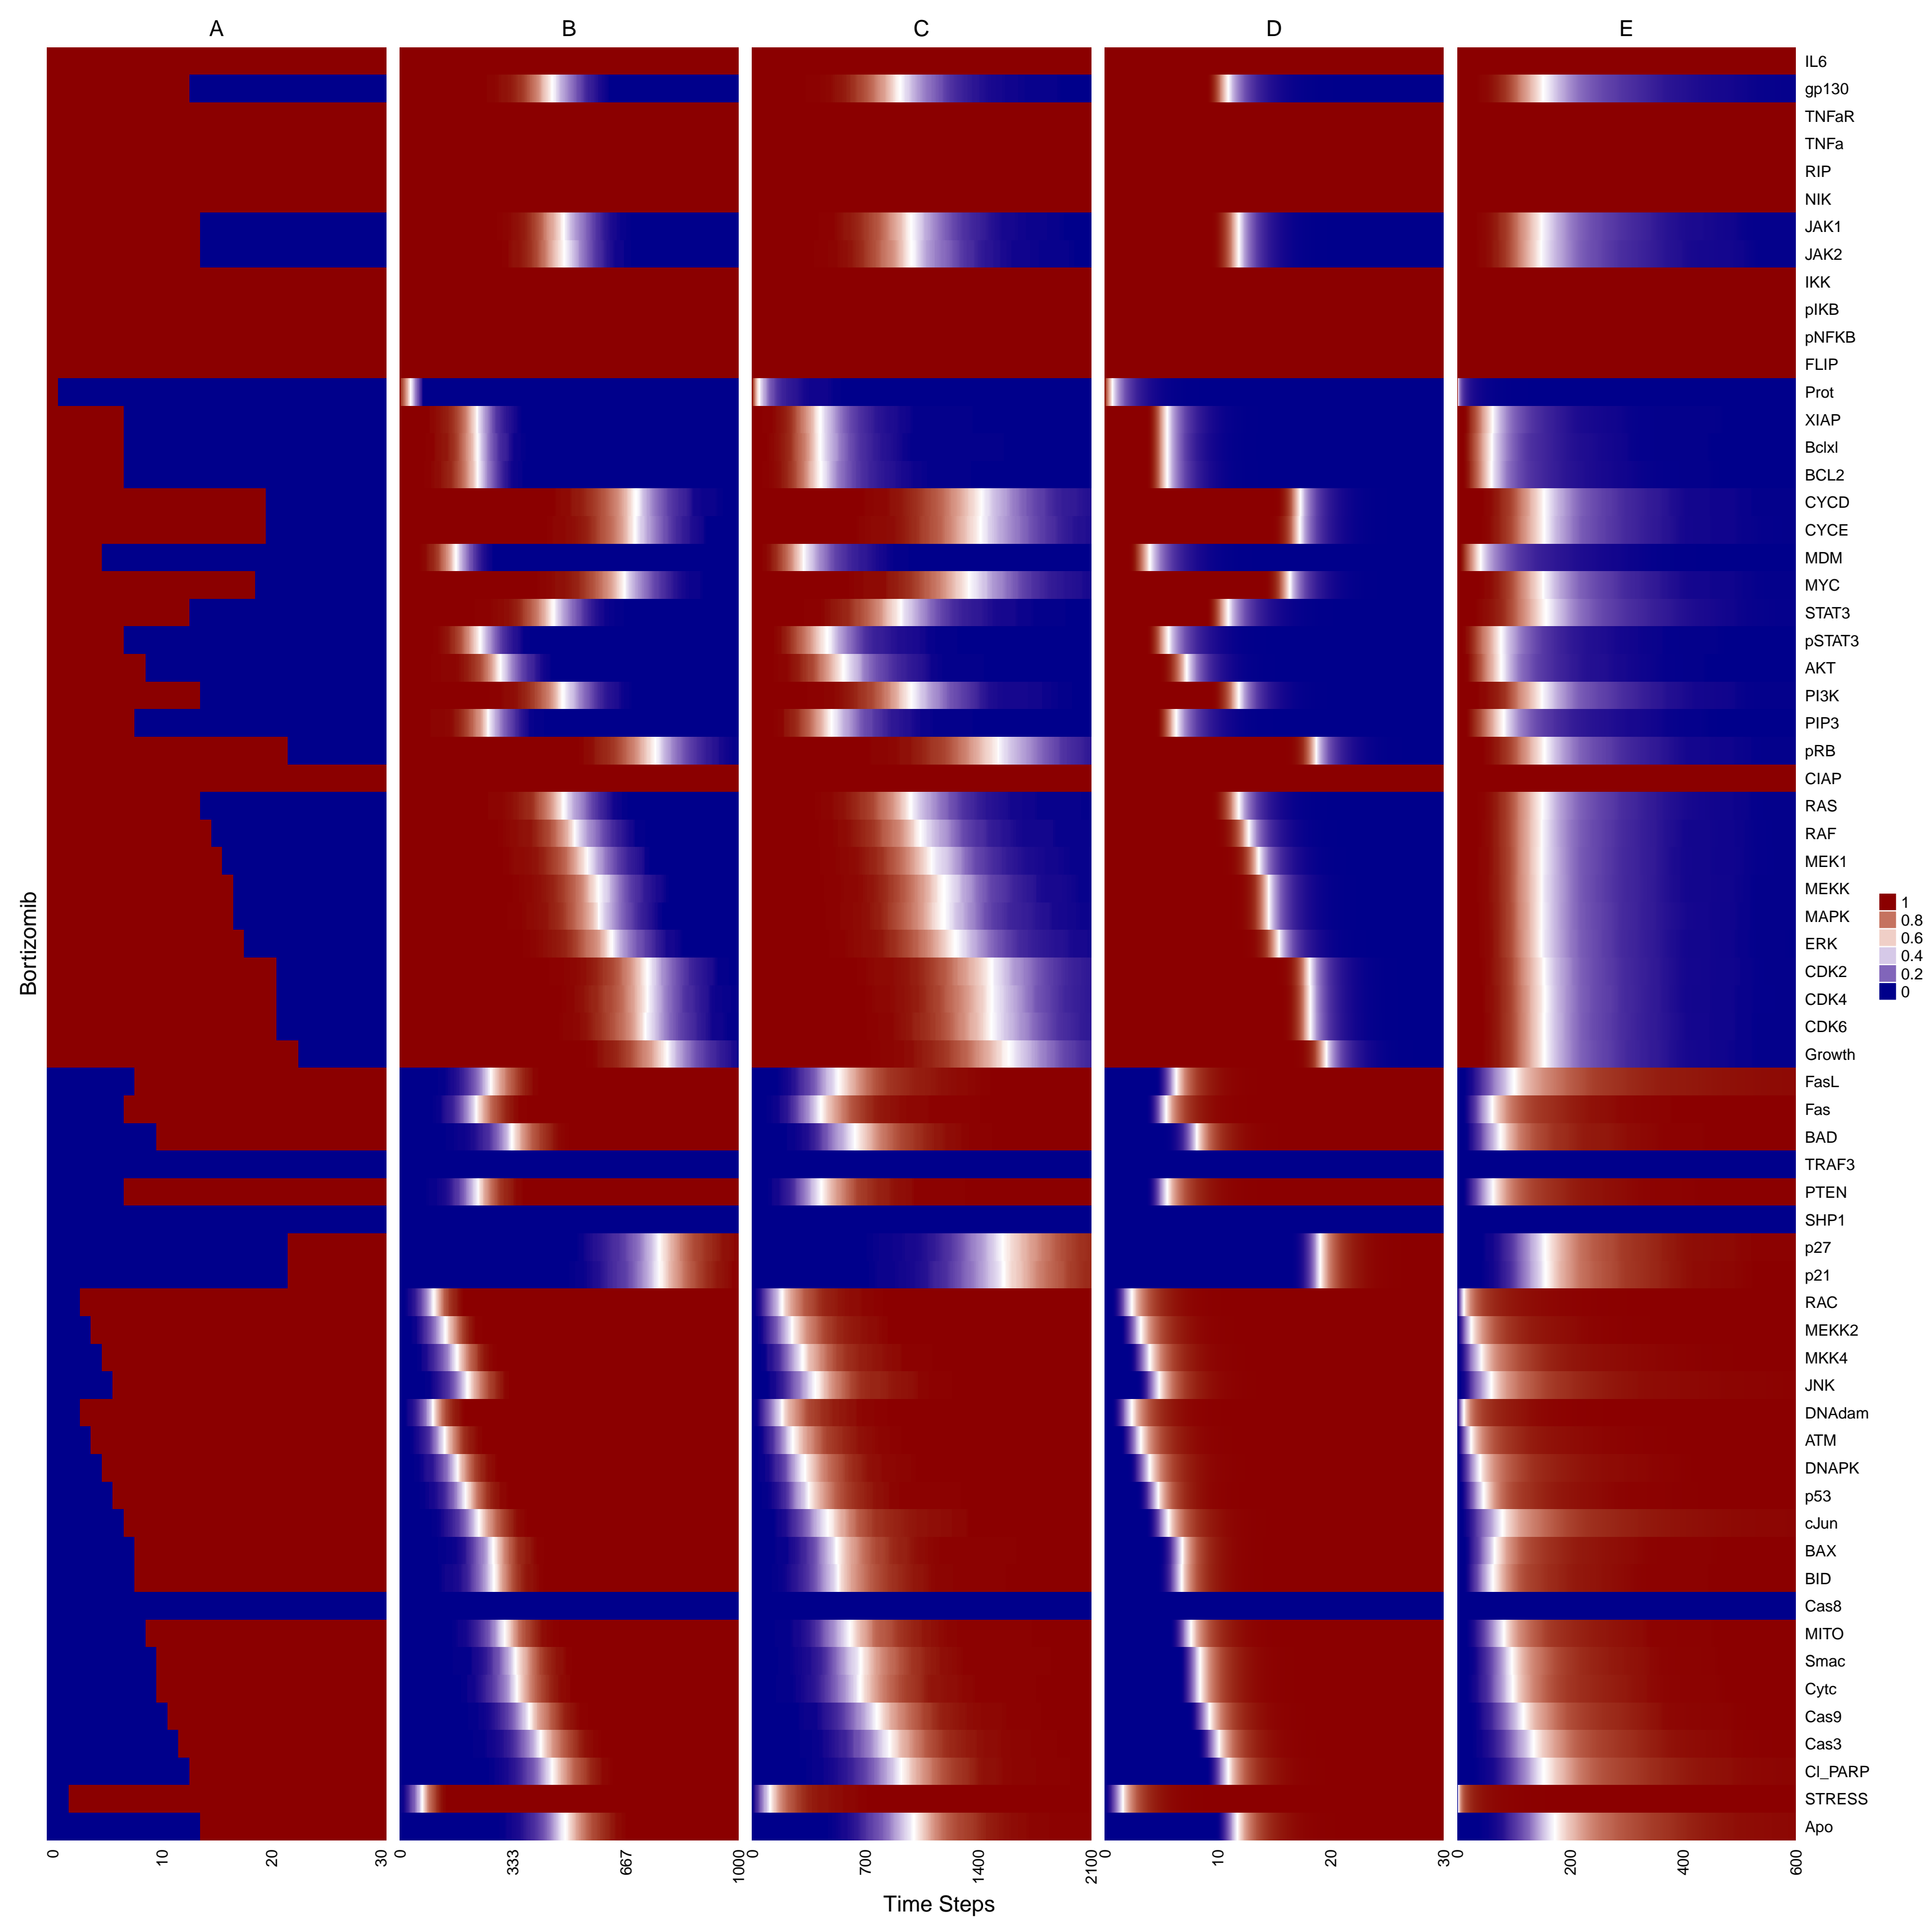

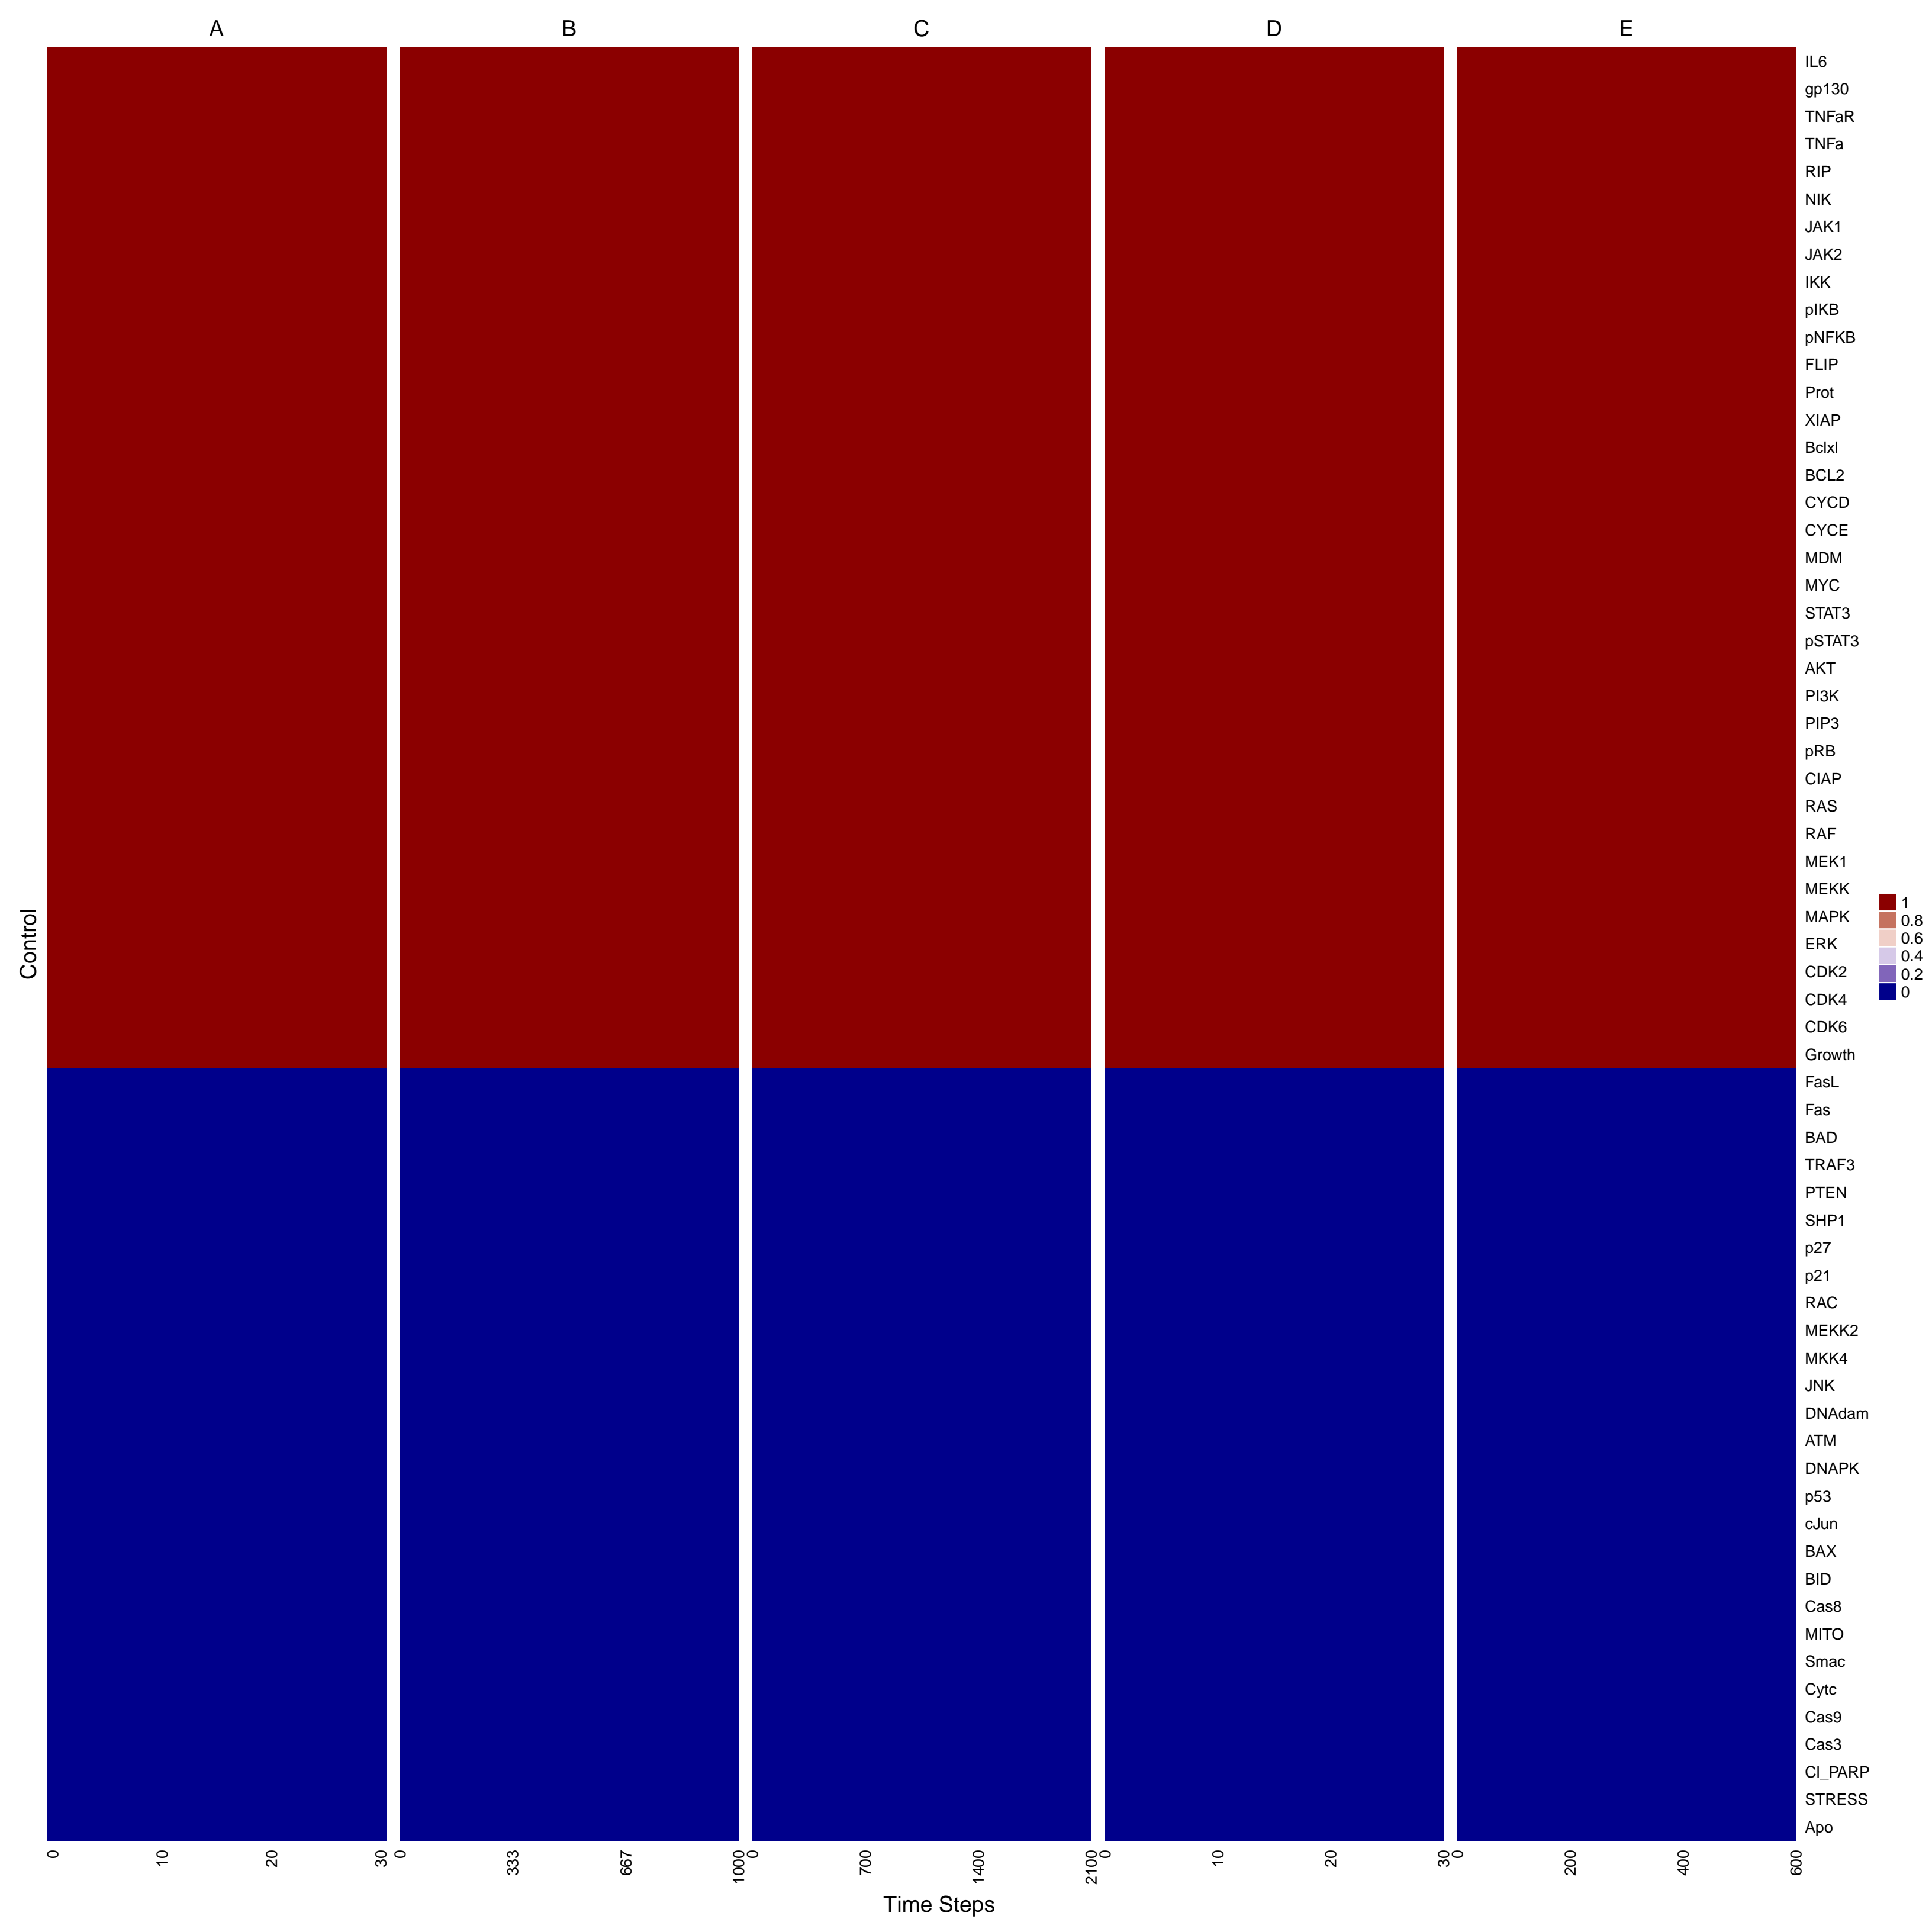

Supplement: NIHMS932890-supplement-1.pdf [file NIHMS932890-supplement-1.pdf]
